# Supplementary material for: A New Family of Macrocyclic Polyamino Biphenolic Ligands: Acid-Base Study, Zn(II) Coordination and Glyphosate/AMPA Binding
Source: MDPI journal article supplement (doi:10.3390/molecules28052031), 2023-02-21
Supplement: s1 [file s1]

A new family of macrocyclic polyamino biphenolic ligands: acid-base study, Zn(II) coordination and glyphosate/AMPA binding

## Supplementary Material

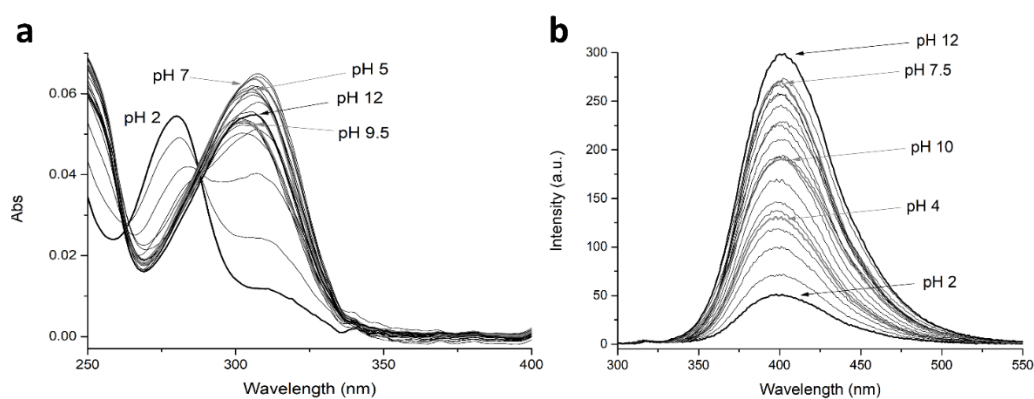

**Figure S1.** a) Absorption and b) fluorescence spectra of **L1** at different pH values. [**L1**] =  $1 \times 10^{-5}$  M,  $\lambda_{\text{ex}}$  = 288,  $\lambda_{\text{em}}$  = 403 nm.

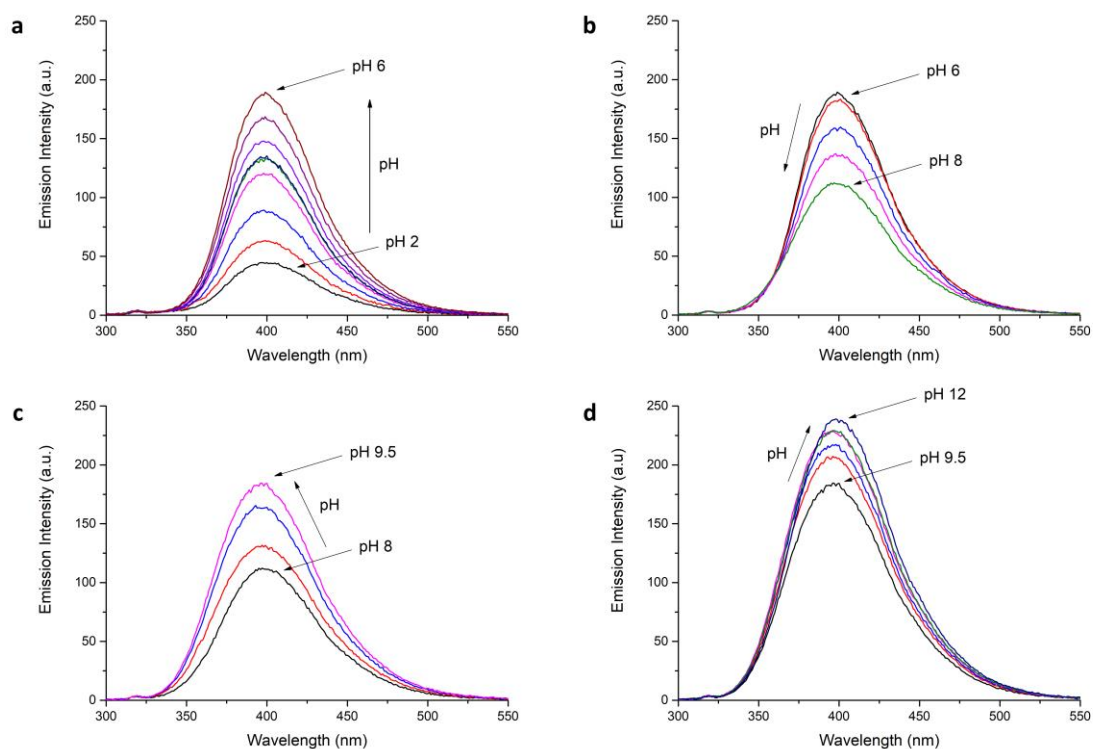

**Figure S2.** Fluorescence spectra of **L1** + 1 equiv. of Zn(II) at different pH values ( $\lambda_{\text{ex}}$  288 nm).

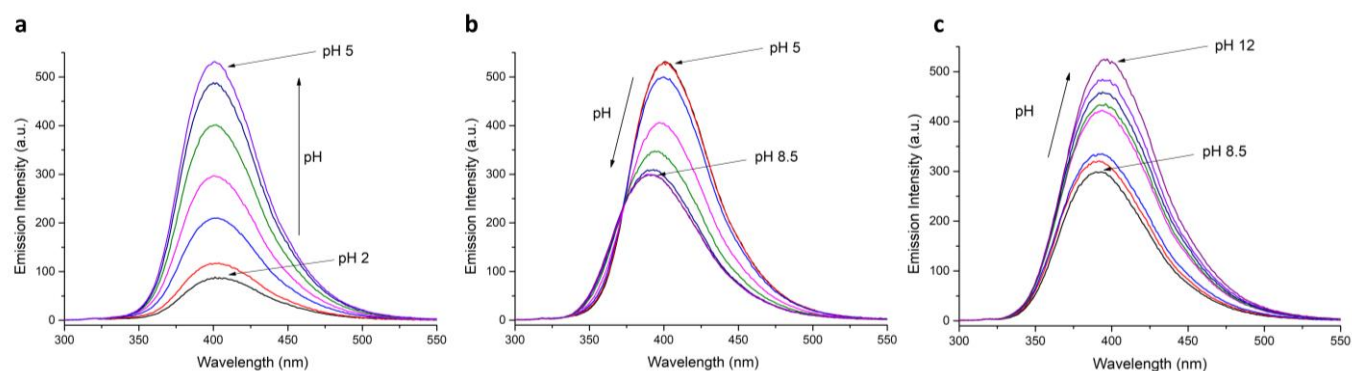

**Figure S3.** Fluorescence spectra of **L2** + 1 equiv. of Zn(II) at different pH values ( $\lambda_{\text{ex}}$  288 nm).

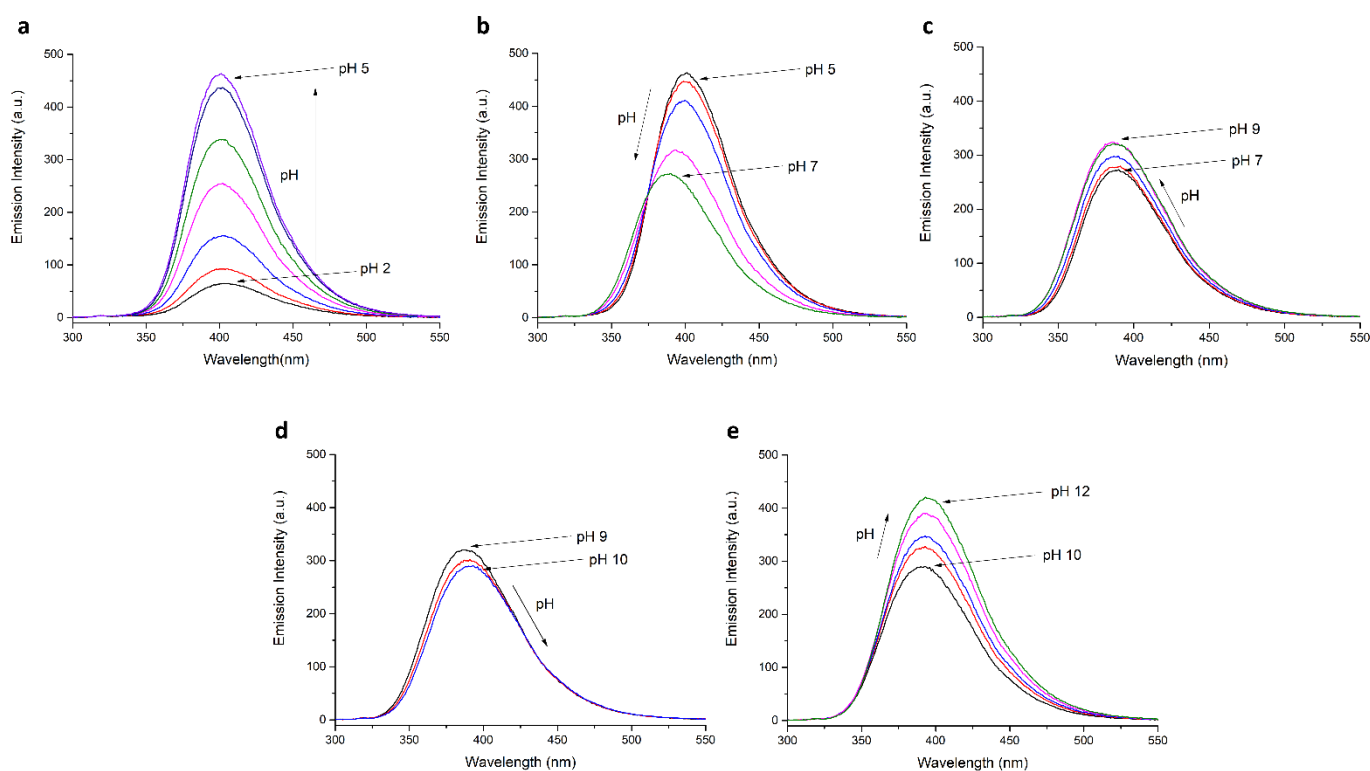

**Figure S4.** Fluorescence spectra of **L2** + 2 equiv. of Zn(II) at different pH values ( $\lambda_{\text{ex}}$  288 nm).

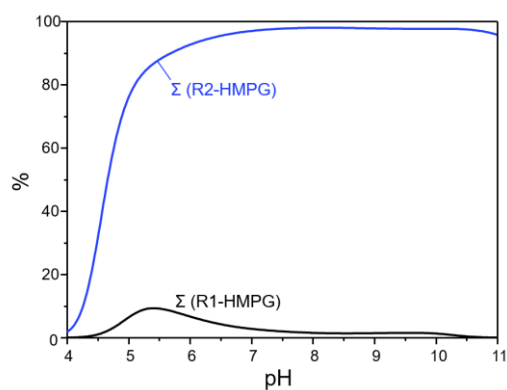

**Figure S5.** Selectivity diagrams showing the affinity of glyphosate ( $HPMG^{2-}$ ) with the mononuclear  $Zn(II)$  complex species of **L1** and **L2** ( $R1$  and  $R2$ , respectively) as a function of pH. Percentages were calculated with respect to ligand concentrations ( $[R1] = [R2] = [HPMG] = 1 \times 10^{-3}$  M,  $R1 = \Sigma Zn(II)$ -mononuclear species of **L1** bound and  $R2 = \Sigma Zn(II)$ -mononuclear species of **L2** bound).
